# Supplementary material for: Electrochemical properties of stoichiometric CuS coated on carbon fiber paper and Cu foil current collectors as cathode material for lithium batteries
Source: Royal Society of Chemistry journal article supplement (doi:10.1039/c7ta00614d), 2017-01-01
Supplement: c7ta00614d1.pdf [file c7ta00614d1.pdf]

## **Electronic supplementary information**

### **Electrochemical Properties of Stoichiometric CuS Coated on Carbon Fiber Paper and Cu Foil Current Collectors as Cathode Material for Lithium Batteries**

Gulnur Kalimuldina<sup>a</sup>, Izumi Taniguchi<sup>b,\*</sup>

<sup>a</sup> Department of Chemical Engineering, Tokyo Institute of Technology, Tokyo 152-8552, Japan

<sup>b</sup> Department of Chemical Science and Engineering, Tokyo Institute of Technology, Tokyo 152-8552, Japan

\* Corresponding author e-mail: [taniguchi.i.aa@m.titech.ac.jp](mailto:taniguchi.i.aa@m.titech.ac.jp)

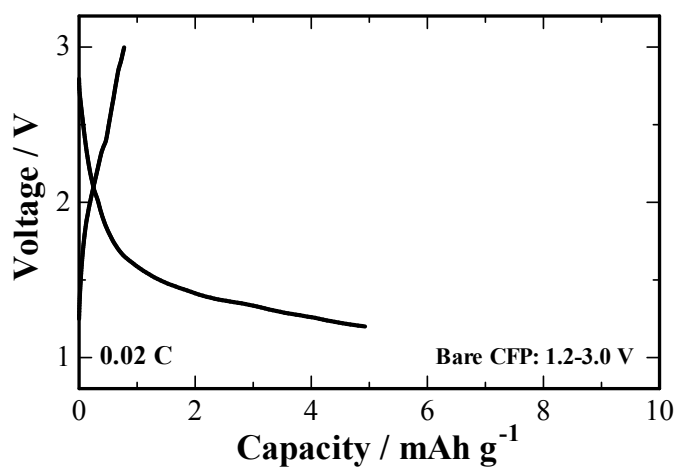

**Fig. S1** 1<sup>st</sup> charge-discharge profiles of bare CFP electrode at 0.02 C between 1.2-3.0 V.

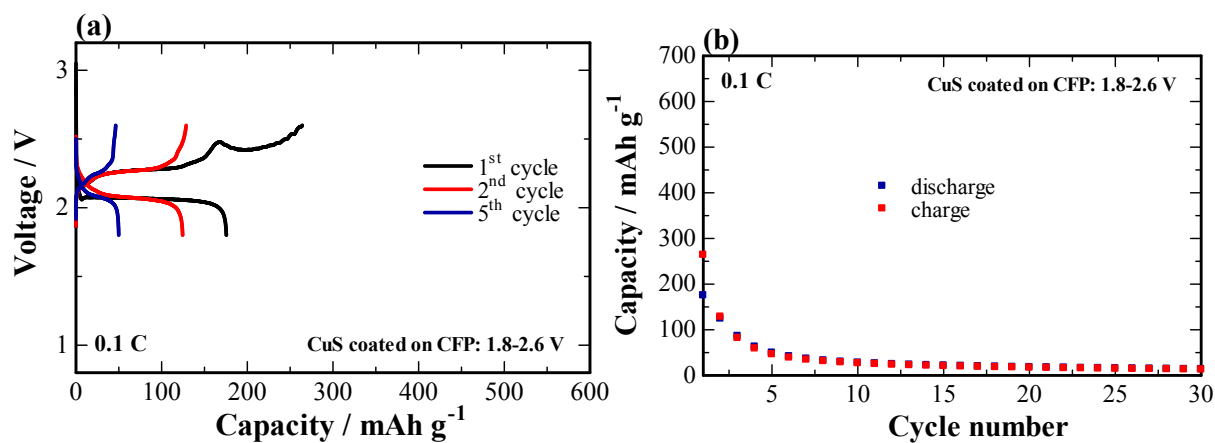

**Fig. S2** (a) Charge-discharge profile of stoichiometric CuS coated on a CFP current collector and cycled at 0.1 C between 1.8-2.6 V at the 1<sup>st</sup>, 2<sup>nd</sup>, and 5<sup>th</sup> cycles. (b) Cycling performance at 0.1 C for 30 cycles.

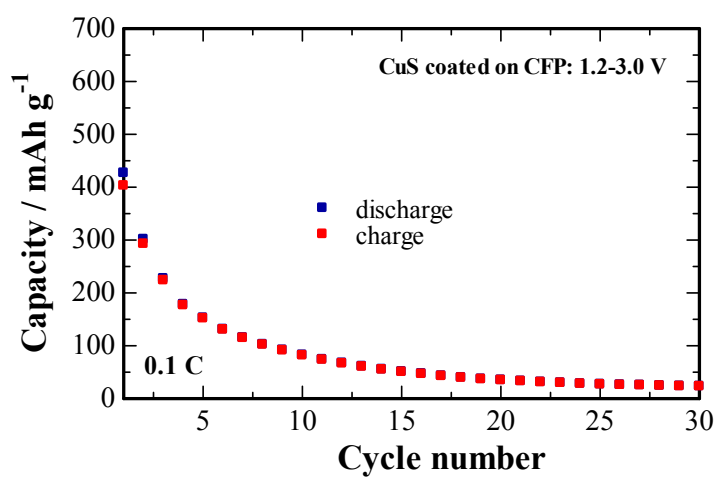

**Fig. S3** Cycling performance of stoichiometric CuS coated on a CFP current collector at 0.1 C for 30 cycles.

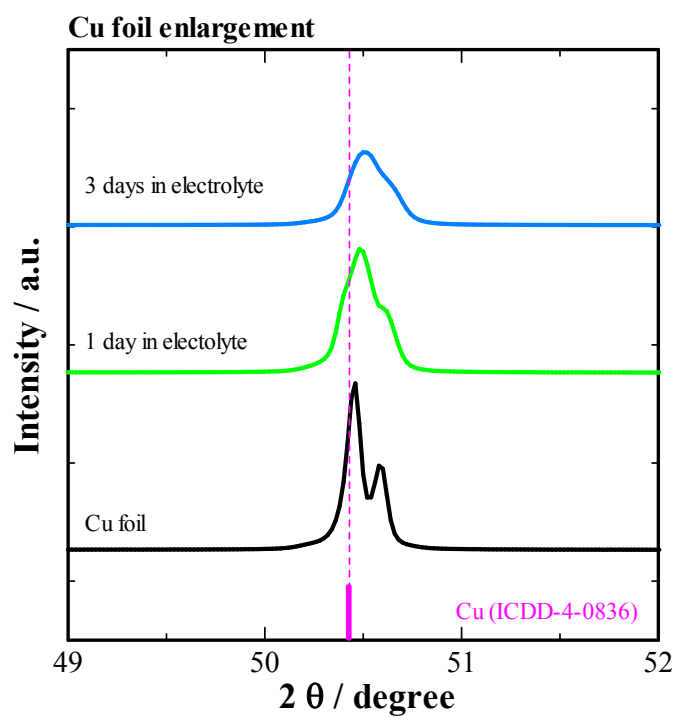

**Fig. S4** An enlargement of the XRD patterns (49-52 °) of the bare Cu foil and the Cu foil after soaking in the electrolyte for 1 and 3 days.

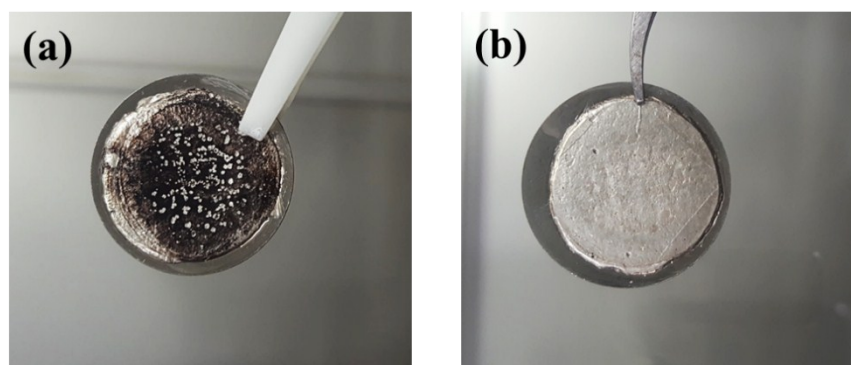

**Fig. S5** Recovered lithium metals after the 1<sup>st</sup> charge at 0.02 C of the cells with stoichiometric CuS coated on (a) a CFP current collector, (b) a Cu foil current collector.

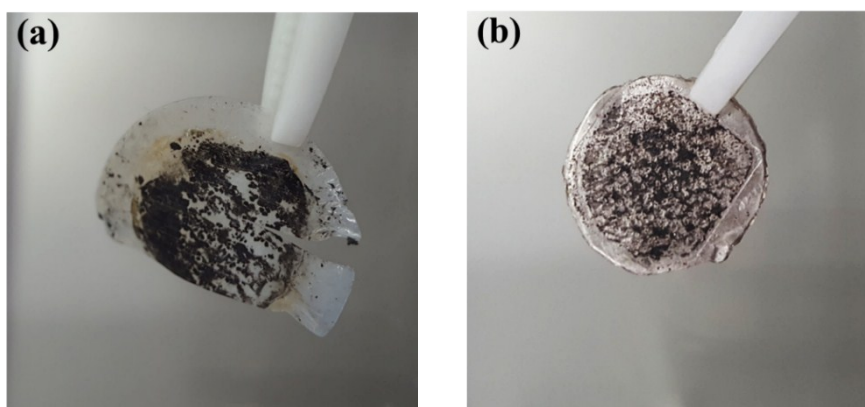

**Fig. S6** Recovered separator and lithium metal after the 20<sup>th</sup> charge at 0.1 C from the cell with stoichiometric CuS electrode coated on a Cu foil current collector.

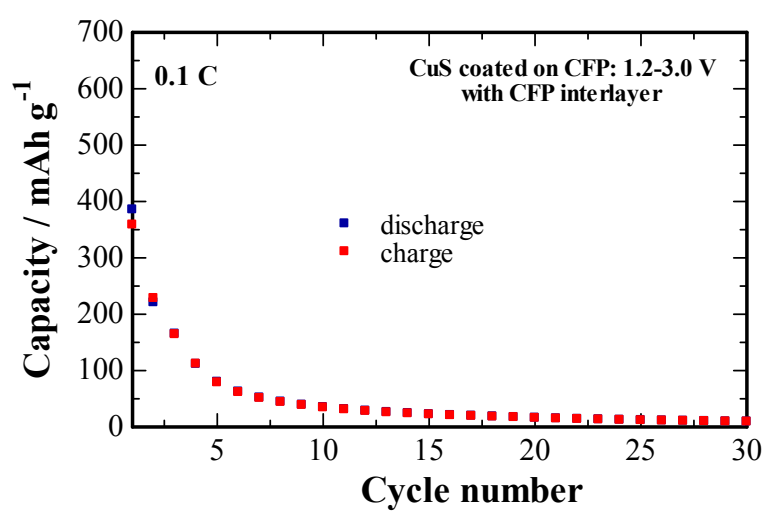

**Fig. S7** Cycling performance of stoichiometric CuS coated on a CFP current collector with a CFP interlayer at 0.1 C for 30 cycles.
